# Supplementary material for: Synthesis, characterization, DFT calculations and anticancer activity of a new oxidovanadium(iv) complex with a ligand derived from o-vanillin and thiophene
Source: Royal Society of Chemistry journal article supplement (doi:10.1039/c9nj02092f), 2019-01-01
Supplement: c9nj02092f1.pdf [file c9nj02092f1.pdf]

### Electronic Supplementary Information

**Table S1.** More relevant geometrical calculated parameters for [VO(oVATPNH<sub>2</sub>)<sub>2</sub>]

| Bond distance (Å) |       | Dihedral angle (°) |        |
|-------------------|-------|--------------------|--------|
| C5-N              | 1.484 | C5-N-V-O1          | -179.2 |
| N-V               | 2.140 | C5'-N'-V-O1'       | -170.3 |
| O1-C8             | 1.314 | C5-N-V-O1'         | -56.9  |
| V-O1              | 1.912 | C5'-N'-V-O1        | -47.5  |
| N-C6              | 1.286 | C5-N-C6-C7         | 178.9  |
| V-O3              | 1.603 | C5'-N'-C6'-C7'     | 174.3  |
| Bond angle (°)    |       | C1-C5-N-C6         | -11.6  |
| C5-N-V            | 114.6 | C1'-C5'-N'-C6'     | 123.0  |
| C6-N-V            | 125.1 | C1-C5-N-V          | 173.7  |
| O1-V-N            | 86.6  | C1'-C5'-N'-V       | -64.3  |
| O1-V-N'           | 85.8  | C8-O1-V-N          | -2.3   |
| N-V-N'            | 163.6 | C8'-O1'-V-N'       | -5.6   |
| O1-V-O1'          | 122.1 | C8-O1-V-N'         | -171.0 |
| O3-V-O1           | 119.8 | C8'-O1'-V-N        | -169.5 |
| O3-V-N            | 98.0  | C6-N-V-O1          | 6.4    |
| C8-O1-V           | 135.2 | C6'-N'-V-O1'       | 1.7    |
| C1-C5-N           | 115.8 | C6-N-V-O1'         | 128.7  |
| C5-N-C6           | 118.0 | C6'-N'-V-O1        | 124.6  |
| N-C6-C7           | 127.4 | C5-N-V-O3          | 58.2   |
|                   |       | S-C1-C5-N          | 105.0  |
|                   |       | S'-C1'-C5'-N'      | -105.8 |
|                   |       | C13-O2- C9-C8      | -175.3 |
|                   |       | C13'-O2'-C9'-C8'   | 176.0  |

**Table S2.** Vibrational spectra of [VO(oVATPNH<sub>2</sub>)<sub>2</sub>]. Assignment and comparison with the free ligand (oVATPNH<sub>2</sub>) data (wavenumbers in cm<sup>-1</sup>)

| oVATPNH <sub>2</sub> (a) |         |      |                                                     | VO(oVATPNH <sub>2</sub> ) <sub>2</sub> |          |           |                                                               |
|--------------------------|---------|------|-----------------------------------------------------|----------------------------------------|----------|-----------|---------------------------------------------------------------|
| IR.                      | Raman   | Calc | Assignment                                          | IR                                     | Raman    | Calc.     | Assignment                                                    |
| 3003 vw                  | 3005 w  | 3153 | ν O-H                                               |                                        |          |           |                                                               |
| 2923 sh                  | 2928 m  | 3045 | ν <sub>as</sub> CH <sub>2</sub>                     | 2917 sh                                |          | 3114/3093 | ν <sub>as</sub> CH <sub>2</sub>                               |
| 1631 vs                  | 1635 vs | 1685 | ν C=N                                               | 1613 vs                                | 1621 vs  | 1677/1671 | ν C=N                                                         |
| 1583 sh                  | 1587 m  | 1660 | ν ring (oVA)                                        | 1601 sh                                |          | 1639/1636 | ν ring (oVA)                                                  |
|                          |         | 1618 | + δ O-H                                             | 1555 m                                 | 1558 s   |           |                                                               |
| 1462 vs                  | 1472 m  | 1505 | δ <sub>as</sub> CH <sub>3</sub>                     | 1469 s                                 | 1474 s   | 1505      | δ <sub>as</sub> CH <sub>3</sub>                               |
|                          | 1440 m  | 1493 | δ <sub>as</sub> CH <sub>3</sub>                     | 1452 s,b                               | 1444 vs  | 1491      | δ <sub>as</sub> CH <sub>3</sub>                               |
| 1415 m,b                 |         | 1480 | δ CH <sub>2</sub>                                   | 1404 m                                 |          | 1498      | δ CH <sub>2</sub>                                             |
|                          |         | 1460 | δ O-H + δ <sub>s</sub> CH <sub>3</sub> + δ C-H(oVA) |                                        |          | 1477/1471 | ν coord. ring + δ CH <sub>2</sub>                             |
|                          |         |      |                                                     |                                        |          | 1475/1475 | δ <sub>s</sub> CH <sub>3</sub>                                |
| 1333 m-w                 | 1337 s  | 1355 | ρ <sub>w</sub> CH <sub>2</sub>                      | 1362 vw                                | 1348 s   | 1393/1390 | ρ <sub>w</sub> CH <sub>2</sub> + δ CH (Tph) + δ C-H (Ar-CH)   |
|                          |         |      |                                                     | 1334 m,b                               |          | 1383/1382 | ν ring (oVa) + ρ <sub>w</sub> CH <sub>2</sub> + δ C-H (Ar-CH) |
|                          |         |      |                                                     |                                        |          | 1373      | ρ <sub>w</sub> CH <sub>2</sub>                                |
| 1313 m                   |         | 1315 | ν C-O (ArOH) + δ C-H (oVA)                          | 1301 s,b                               | 1312 m   | 1370/1349 | ν C-O (Ar-O) + δ C-H (Ar-CH) + ρ <sub>w</sub> CH <sub>2</sub> |
|                          |         |      |                                                     |                                        |          | 1335      | ν C-O(Ar-O) + ρ <sub>w</sub> CH <sub>2</sub>                  |
| 1269 s                   |         | 1286 | δ C-H (Tph) + ρ <sub>r</sub> CH <sub>2</sub>        |                                        | 1272 vw  | 1307/1301 | δ CH (Tph) + ρ <sub>r</sub> CH <sub>2</sub>                   |
| 1255 vs                  | 1258 vw | 1282 | ν C-OCH <sub>3</sub> + δ C-H (oVA)                  | 1247 s,b                               |          | 1276/1275 | ν C-OCH <sub>3</sub> + δ CH (oVa)                             |
| 1242 sh                  | 1229 m  | 1168 | ν C-CH <sub>2</sub>                                 | 1226 m,b                               | 1229 m-s | 1157/1156 | ν C-CH <sub>2</sub>                                           |
| 1081 m-s                 | 1088 m  | 1129 | ν O-CH <sub>3</sub> + δ ring (oVA)                  | 1080 m                                 | 1083 w   |           |                                                               |
|                          |         |      |                                                     |                                        |          | 1112/1109 | ν O-CH <sub>3</sub> + δ CH (oVa)                              |
|                          |         |      |                                                     | 993, m,b                               | 992 mw   | 1054      | ν V=O                                                         |
| 853 mw                   | 856 vw  | 842  | γ C-H (Tph)                                         | 865 m,s                                | 859 vw   | 855       | γ C-H (Tph)                                                   |
|                          |         |      |                                                     | 853 w                                  |          |           |                                                               |
| 832 ms,b                 | 838 w   | 851  | γ O-H                                               |                                        |          |           |                                                               |
| 750 mw                   | 757 w   | 762  | ν S-CH + δ C-C-C(CH <sub>2</sub> )                  | 757 w                                  | 760 m    | 751/753   | ν S-CH + δ ring(oVa)                                          |
| 736 s                    | 735 m   | 740  | γ C-H (oVA)                                         | 742 m                                  | 743 w    | 748       | γ C-H (oVA)                                                   |
| 725 s                    |         | 742  | δ ring (oVA)                                        | 717 m                                  |          | 764       | δ ring [oVA + Tph]                                            |
|                          |         |      |                                                     | 694 sh                                 | 695 vw   |           |                                                               |
| 615 vw                   | 620 m   | 627  | δ ring [oVA + Tph]                                  | 617 w                                  |          | 625       | δ ring [oVA + Tph]                                            |
|                          |         |      |                                                     | 611 sh                                 | 602 m    | 612       | + δ coord ring                                                |
|                          |         |      |                                                     |                                        |          | 587       | ν <sub>as</sub> O-V-O + γ ring (Tph) + γ ring (oVA)           |
|                          |         |      |                                                     |                                        |          | 581       | ν <sub>s</sub> O-V-O + δ Ar-O-CH <sub>3</sub> + γ ring (Tph)  |
|                          |         |      |                                                     | 461 w,b                                | 467 sh   | 460/443   | ν <sub>as</sub> N-V-N                                         |
|                          |         |      |                                                     |                                        | 444 w    | 464/455   | ν <sub>s</sub> N-V-N                                          |

(a) Data extracted from ref<sup>21</sup>. vs: very strong, s: strong, m: medium, w: weak, vw: very weak, b: broad, sh: shoulder; Tph: thiophene ring.

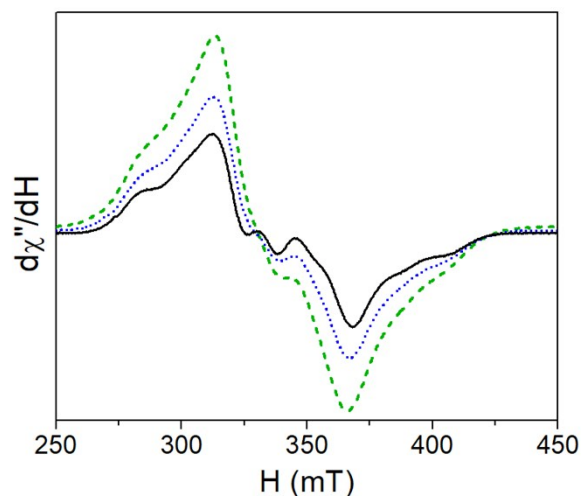

**Figure S1.** EPR spectra of  $[\text{VO}(\text{oVATPNH}_2)_2]$  (III) at different temperatures: 298 K (solid line), 200 K (dotted line) and 120 K (dashed line). Experimental details: modulation frequency = 100 kHz, modulation amplitude = 0.1 mT, time constant = 40.96 ms, conversion time = 81.92 ms, gain =  $6,3 \times 10^4$ , power = 2.0 mW, microwave frequency = 9.4223 (298 K), 9.4225 (200 K) and 9.4258 GHz (120 K).

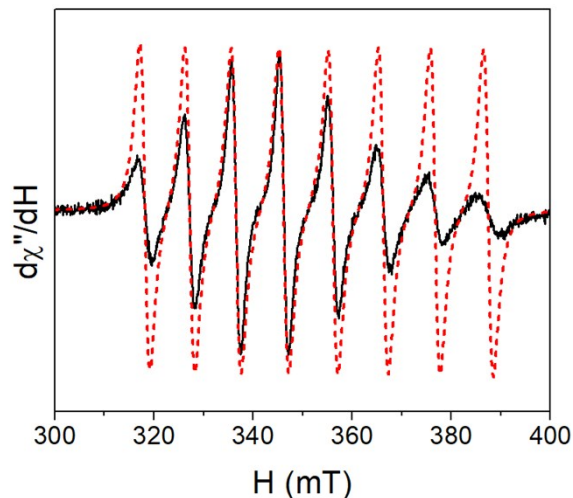

**Figure S2.** EPR spectrum of  $[\text{VO}(\text{oVATPNH}_2)_2]$  (III) solution in a (1:1) (ethanol:DMF) at 298 K (solid line) together with the best fit (dashed line). Experimental details: modulation frequency = 100 kHz, modulation amplitude = 0.1 mT, time constant = 40.96 ms, conversion time = 327.68 ms, gain =  $6,3 \times 10^4$ , power = 20.0 mW, microwave frequency = 9.7624 GHz. Fitting parameters: (a) Lorentzian-type signal,  $g_{\text{iso}} = 1.974$ ;  $A_{\text{iso}} = 9.9$  mT ( $91.2 \times 10^{-4} \text{ cm}^{-1}$ ) (linewidth  $H_{\text{iso}} = 2.0$  mT).

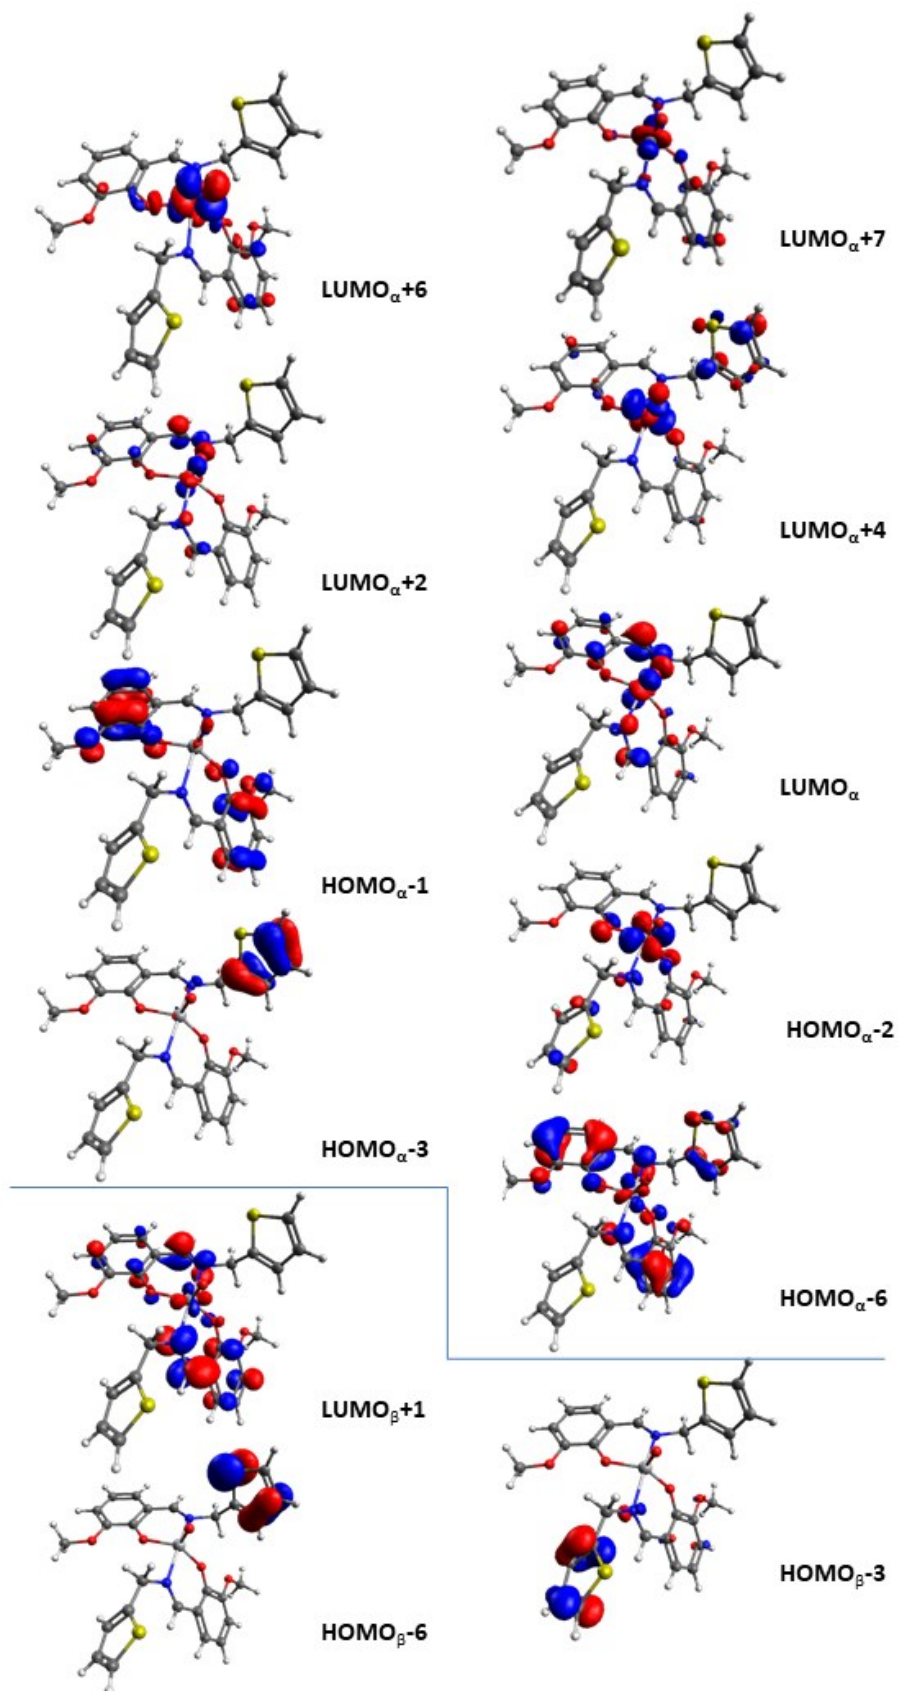

**Figure S3.** Molecular orbitals involved in the electronic transitions of  $[\text{VO}(\text{oVATPNH}_2)_2]$

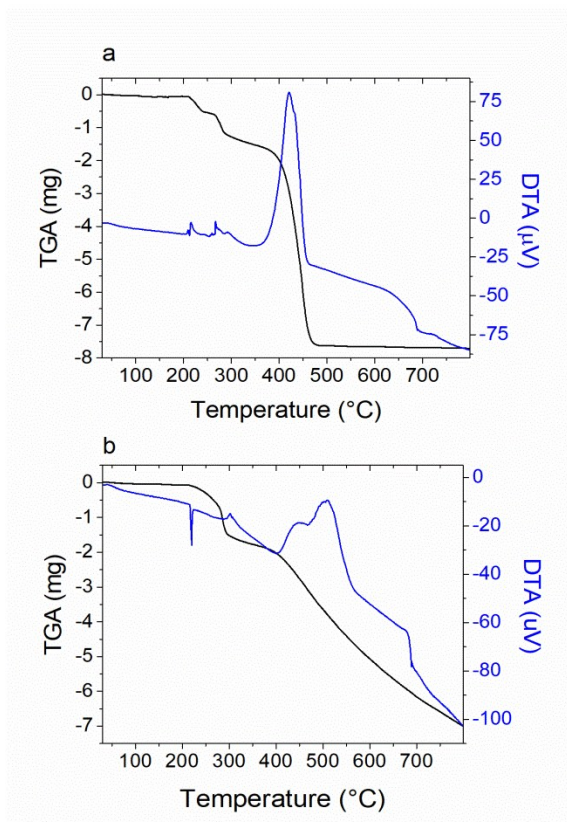

**Figure S4.** Thermal analysis of the solid complex  $[\text{VO}(\text{oVATPNH}_2)_2]$  **a.** in oxygen **b.** in nitrogen atmosphere.

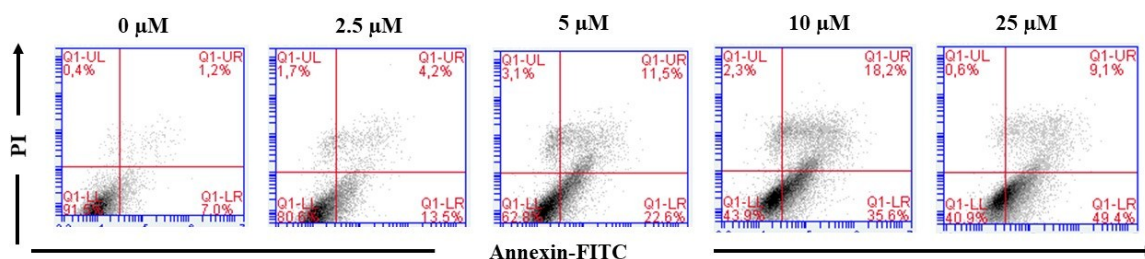

**Figure S5.** Effect of  $[\text{VO}(\text{oVATPNH}_2)_2]$  on apoptosis assessed by flow cytometry using annexin V– fluorescein isothiocyanate (FITC)/propidium iodide (PI) staining. The plots are representative of three independent experiments. The numbers in the Q1LR and Q1UR quadrants indicate the proportions of cells that are annexin V positive/PI negative and annexin V positive /PI positive, respectively
